# Supplementary material for: Stressed at Work: Investigating the Relationship between Occupational Stress and Salivary Cortisol Fluctuations
Source: MDPI journal article supplement (doi:10.3390/ijerph191912311), 2022-09-28
Supplement: s1 [file s1]

**Table S1.** Summary of the intense occupational stressors experienced by participants (intensity of stress = 3, 4, or 5).

| Participant's Career                | Stress Level | Stressor Entry                                                                                                                                                               | Was this a typical day?                                           |
|-------------------------------------|--------------|------------------------------------------------------------------------------------------------------------------------------------------------------------------------------|-------------------------------------------------------------------|
| Principal Scientist                 | 3            | Positive stress of having many urgent things to do and limited time.                                                                                                         | Yes                                                               |
| Principal Scientist                 | 3            | Positive stress. Exciting discussions & experiment planning.                                                                                                                 | Yes                                                               |
| Health Insurance Supervisor         | 3            | Found out one of my associates made a big mistake and I have to write her up. But I don't think the reasoning for this policy is fair. So I don't agree w/error. Frustrated. | Yes, typical Wednesday full of meetings from 8-430pm              |
| Health Insurance Supervisor         | 3            | Meeting with manager about my team lead's poor communication skills. Felt stressed and overwhelmed.                                                                          | Yes, a normal Thursday working from home. Usual amount of stress. |
| Health Insurance Supervisor         | 5            | I had to fire one of my associates today at 3pm. At 11am I started to prepare. Nervous, overwhelmed                                                                          | Yes, a normal Thursday working from home. Usual amount of stress. |
| Online University Admission Advisor | 3            | Issues w/tech – not able to have access. I feel angry at this situation.                                                                                                     | Yes                                                               |
| Online University Admission Advisor | 4            | Continued tech issues – dog bothering me. Anger at dog, annoyed about work                                                                                                   | Yes                                                               |
| Online University Admission Advisor | 3            | Tech issues resolved – but now dealing and trying to catch up on work. Overwhelmed                                                                                           | Yes                                                               |
| Online University Admission Advisor | 3            | Given reports to complete/audit I didn't know about. Frustrated                                                                                                              | Yes                                                               |
| Online University Admission Advisor | 3            | Struggling with work-mail merge – long process – needs to be completed tomorrow. angry                                                                                       | Yes                                                               |
| Online University Admission Advisor | 3            | Stress about work again – about to start sorting things out – getting emails about other things. Worried & overwhelmed                                                       | Yes                                                               |
| Online University Admission Advisor | 4            | Working on project – sending lots of emails – very demanding. Stressed                                                                                                       | Yes                                                               |
| Marketing                           | 3            | At work, couldn't compute a task for my leader's leader b/c I didn't have the tools necessary. Anxious, worried                                                              | No, team meeting + evening activity                               |
| Marketing                           | 3            | Team building exercise to build the tallest Lego tower w/in 30 min. w/o it falling. Friendly competition.                                                                    | No, team meeting + evening activity                               |
| Marketing                           | 3            | Rushing to get work done to get to a family event I'm not looking forward to. Stressed, angry, rushed                                                                        | No, team meeting + evening activity                               |
| Marketing                           | 3            | Realized I missed my mid-shift sample                                                                                                                                        | Yes                                                               |
| Project Manager                     | 4            | Difficult chat w/co-worker. Stressed                                                                                                                                         | Yes, work day, but long DR apt in middle                          |
| Project Manager                     | 3            | Last minute important request. Confused                                                                                                                                      | Yes, work day, but long DR apt in middle                          |
| Project Manager                     | 3            | Going over large to-do list w/co-worker. Annoyed                                                                                                                             | Yes                                                               |
| Project Manager                     | 3            | Co-worker forgetting important request. Annoyed/stressed                                                                                                                     | No, I don't usually work today                                    |
| Internet Marketer                   | 3            | Unforeseen problem at work.                                                                                                                                                  | Yes                                                               |
| Information Security Manager        | 3            | Excel formula formatting date. DATEVALUE function needed                                                                                                                     | Yes                                                               |
| Information Security Manager        | 3            | Dentist appt traffic, late. Next appt. July. Work meeting ran over.                                                                                                          | Yes                                                               |
| Graduate Student                    | 3            | Too many assignments to do                                                                                                                                                   | Start of the work week                                            |
| Graduate Student                    | 5            | Rework on lab reports                                                                                                                                                        | Yes                                                               |
| Graduate Student                    | 5            | Working with the reports. Stressful                                                                                                                                          | Yes                                                               |
| Graduate Student                    | 5            | Working with the reports. Stressful                                                                                                                                          | Yes                                                               |
| Graduate Student                    | 3            | Finally done but worried with others. Relief but worried.                                                                                                                    | Yes                                                               |
| Nurse                               | 3            | Lab results done wrong. Anxious                                                                                                                                              | Yes                                                               |

|                              |     |                                                                                                                                                  |                                                        |
|------------------------------|-----|--------------------------------------------------------------------------------------------------------------------------------------------------|--------------------------------------------------------|
| Rapid Response Team Nurse    | 4   | Labs weren't as good as expected. Frustrated nothing was working                                                                                 | Yes                                                    |
| Rapid Response Team Nurse    | 3   | Getting an arterial blood gas stick on a dehydrated pt. Rushed, stressed                                                                         | Yes                                                    |
| Rapid Response Team Nurse    | 3   | Last minute bed change due to a shit explosion (literally). Had a lot to do, don't like the smell of C. diff.                                    | Yes                                                    |
| Rapid Response Team Nurse    | 3   | Patient's whole family in room – very sick patient. Sad, empathy                                                                                 | Yes                                                    |
| Rapid Response Team Nurse    | 3   | Transporting my ventilated pt. To MRI. MD insisted on transporting very sick pt against my advice. Stress, uneasy                                | Yes                                                    |
| Rapid Response Team Nurse    | 4   | Setting up nitric on COVID pt. Rushed                                                                                                            | Yes                                                    |
| Health Center Office Manager | 4   | Employee not at work and no one heard from them in 7 days. Worried.                                                                              | No, missing employee                                   |
| Health Center Office Manager | 4   | Police notified of missing employee. Unknown emotional distress – felt sick to stomach                                                           | No, missing employee                                   |
| Health Center Office Manager | 3.5 | Appts canceled & boss asking about current policies. Boss wanting to implement new cancellation policies.                                        | No, missing employee                                   |
| Health Center Office Manager | 3   | Having work load doubled & having to take clients that I wasn't prepared for. Anxiety & overwhelmed at situation.                                | No, missing employee                                   |
| Health Center Office Manager | 3.5 | Client arriving late. When client is late, it makes my schedule run behind.                                                                      | Yes                                                    |
| Registered Nurse             | 4   | I have to get up earlier than usual on Wed. I'm not a morning person.                                                                            | Yes, sees home care pts. Instead of clinic             |
| Registered Nurse             | 3   | A family changed visit time. Stressed at having to move pt. Visit.                                                                               | Yes, sees home care pts. Instead of clinic             |
| Registered Nurse             | 3   | 2 genetic counselors on our team working from home. All calls coming to me. Can't get other work done.                                           | Yes                                                    |
| Registered Nurse             | 4   | Patient died very unexpectedly. Sad – wondering if I could have done anything differently.                                                       | Yes                                                    |
| Wastewater biologist         | 3   | Training new staff. Equipment failures. Busy & high stress afternoon                                                                             | Yes                                                    |
| Wastewater biologist         | 4   | Boss made unnecessary changes to process and took vital equipment offline; All because they didn't follow through on scheduling ahead. Anger     | Yes                                                    |
| Wastewater biologist         | 4   | Above mentioned supervisor left early from work w/o resolving issues or leaving any instructions. Frustration                                    | Yes                                                    |
| Accounting Specialist        | 3   | Trying to start payroll batch on my own. Feeling frazzled trying to remember the step by step                                                    | Payroll day, we process payroll for the entire company |
| Accounting Specialist        | 3   | My desk is full of paperwork and it's approaching the end of the day. It's been busy! I'm moving quickly.                                        | Payroll day, we process payroll for the entire company |
| Accounting Specialist        | 3   | In a training call for new ERP system watching co-worker navigate. I was doing a similar training before.                                        | No, training in new ERP system.                        |
| Registered Nurse             | 5   | Getting report on 5 patients for the day. Sick challenging patients. Worried.                                                                    | Yes                                                    |
| Registered Nurse             | 5   | Patient needing to use commode but RN stuck in another room with sick pt. Patient messed his pants. Family & pt. were upset. Frustrated & angry. | Yes                                                    |
| Registered Nurse             | 5   | Rapid response – new nurses pt. In midst of stroke. Helping him through. Fear, worried, relief, adrenaline rush!                                 | Yes                                                    |
| Registered Nurse             | 3   | Catching up on everything. Behind because of rapid response.                                                                                     | Yes                                                    |
| Registered Nurse             | 4   | Start of shift – a charge nurse with full team of sick pts. No help...                                                                           | Yes                                                    |
| Registered Nurse             | 4   | Busy sending two patients home at same time and getting everything together. Rushed                                                              | Yes                                                    |

|                  |   |                                                                                                                                                                                                |     |
|------------------|---|------------------------------------------------------------------------------------------------------------------------------------------------------------------------------------------------|-----|
| Registered Nurse | 4 | New admits almost as soon as beds are cleaned from old ones. Still not caught up on computer charting. No unit clerk, no pch. Trying to make pts. feel they are getting the care they deserve. | Yes |
| Registered Nurse | 3 | I scheduled appt. But know they are short sort of on call wondering if I'm needed. Anxiety.                                                                                                    | Yes |
| Registered Nurse | 3 | Had to go into work 6 hours. Sitting for dementia patients. Not a bad afternoon                                                                                                                | Yes |
